# Supplementary material for: Undetectable measurable residual disease is associated with improved outcomes in AML irrespective of treatment intensity
Source: PubMed Central journal article supplement — Blood Adv. 2023 Mar 9;7(13):3284–96. doi: 10.1182/bloodadvances.2022009391 (PMC10336257; doi:10.1182/bloodadvances.2022009391), 2023-03-09
Supplement: BLOODA_ADV-2022-009391-mmc1.pdf [file BLOODA_ADV-2022-009391-mmc1.pdf]

## **Supplemental Materials for:**

### **Undetectable Measurable Residual Disease is Associated with Improved Outcomes in AML Irrespective of Treatment Intensity**

Alexandre Bazinet, Tapan Kadia, Nicholas J. Short, Gautam Borthakur, Sa A. Wang, Wei Wang, Sanam Loghavi, Jeffrey Jorgensen, Keyur Patel, Courtney DiNardo, Naval Daver, Yesid Alvarado, Fadi G. Haddad, Sherry Pierce, Graciela Nogueras Gonzalez, Abhishek Maiti, Koji Sasaki, Musa Yilmaz, Philip Thompson, William Wierda, Guillermo Garcia-Manero, Michael Andreeff, Elias Jabbour, Marina Konopleva, Xuelin Huang, Hagop Kantarjian, Farhad Ravandi

**Supplemental Table 1.** Multivariate analysis for overall survival and cumulative incidence of relapse with exclusion of best response as a factor (censored for SCT)

| Covariate                            | OS                 |         | CIR                |         |
|--------------------------------------|--------------------|---------|--------------------|---------|
|                                      | HR (95% CI)        | p-value | HR (95% CI)        | p-value |
| <b>Model for all patients</b>        |                    |         |                    |         |
| Age, continuous                      | 1.01 (1.00 - 1.03) | 0.060   | 0.99 (0.97 - 1.00) | 0.146   |
| <b>Treatment cohort</b>              |                    |         |                    |         |
| IA                                   | Reference          |         | Reference          |         |
| LOW + VEN                            | 1.13 (0.70 - 1.83) | 0.605   | 0.90 (0.52 - 1.54) | 0.697   |
| <b>MRD status*</b>                   |                    |         |                    |         |
| Negative                             | Reference          |         | Reference          |         |
| Positive                             | 1.65 (1.08 – 2.53) | 0.020   | 1.64 (1.08 - 2.49) | 0.020   |
| <b>ELN 2017 risk</b>                 |                    |         |                    |         |
| Favorable                            | Reference          |         | Reference          |         |
| Intermediate                         | 1.35 (0.89 – 2.03) | 0.153   | 1.89 (1.23 - 2.91) | 0.004   |
| Adverse                              | 2.11 (1.43 – 3.11) | <0.001  | 2.95 (1.92 – 4.54) | <0.001  |
| <b>Model for patients ≥ 60 years</b> |                    |         |                    |         |
| Age, continuous                      | 1.00 (0.98 - 1.03) | 0.782   | 0.98 (0.95 - 1.02) | 0.318   |
| <b>Treatment cohort</b>              |                    |         |                    |         |
| IA                                   | Reference          |         | Reference          |         |
| LOW + VEN                            | 1.63 (0.80 – 3.33) | 0.175   | 1.50 (0.65 – 3.47) | 0.343   |
| <b>MRD status*</b>                   |                    |         |                    |         |
| Negative                             | Reference          |         | Reference          |         |
| Positive                             | 2.16 (0.77 – 6.04) | 0.142   | 2.19 (0.69 – 6.91) | 0.183   |
| <b>ELN 2017 risk</b>                 |                    |         |                    |         |
| Favorable                            | Reference          |         | Reference          |         |
| Intermediate                         | 1.43 (0.78 - 2.62) | 0.248   | 2.17 (1.06 – 4.44) | 0.034   |
| Adverse                              | 2.12 (1.29 – 3.49) | 0.003   | 2.82 (1.53 – 5.20) | 0.001   |

\*An interaction term composed of the product of MRD status and treatment cohort was included in the above model but not found to be significant.

**Abbreviations:** CI, confidence interval; CIR, cumulative incidence of relapse; ELN, European LeukemiaNet; HR, hazard ratio; IA, idarubicin plus intermediate to high-dose cytarabine; LOW + VEN, low-intensity backbone plus venetoclax; MRD, measurable residual disease; OS, overall survival; SCT, stem cell transplantation.

**Supplemental Table 2.** Multivariate analysis for overall survival and cumulative incidence of relapse with exclusion of MRD as a factor (censored for SCT)

| Covariate                            | OS                 |         | CIR                |         |
|--------------------------------------|--------------------|---------|--------------------|---------|
|                                      | HR (95% CI)        | p-value | HR (95% CI)        | p-value |
| <b>Model for all patients</b>        |                    |         |                    |         |
| Age, continuous                      | 1.02 (1.00 - 1.03) | 0.029   | 0.99 (0.98 - 1.01) | 0.263   |
| <b>Treatment cohort</b>              |                    |         |                    |         |
| IA                                   | Reference          |         | Reference          |         |
| LOW + VEN                            | 1.09 (0.72 - 1.65) | 0.681   | 0.91 (0.58 - 1.44) | 0.695   |
| <b>Best response</b>                 |                    |         |                    |         |
| CR                                   | Reference          |         | Reference          |         |
| CRi                                  | 1.67 (1.17 - 2.40) | 0.005   | 2.17 (1.44 - 3.26) | <0.001  |
| MLFS                                 | 2.98 (1.79 - 4.96) | <0.001  | 2.10 (0.91 - 4.84) | 0.082   |
| <b>ELN 2017 risk</b>                 |                    |         |                    |         |
| Favorable                            | Reference          |         | Reference          |         |
| Intermediate                         | 1.42 (0.94 - 2.13) | 0.093   | 2.07 (1.35 - 3.16) | 0.001   |
| Adverse                              | 2.35 (1.62 - 3.42) | <0.001  | 3.37 (2.24 - 5.09) | <0.001  |
| <b>Model for patients ≥ 60 years</b> |                    |         |                    |         |
| Age, continuous                      | 1.01 (0.98 - 1.04) | 0.355   | 0.99 (0.96 - 1.03) | 0.637   |
| <b>Treatment cohort</b>              |                    |         |                    |         |
| IA                                   | Reference          |         | Reference          |         |
| LOW + VEN                            | 1.37 (0.75 - 2.51) | 0.302   | 1.34 (0.66 - 2.71) | 0.417   |
| <b>Best response</b>                 |                    |         |                    |         |
| CR                                   | Reference          |         | Reference          |         |
| CRi                                  | 1.72 (1.10 - 2.71) | 0.018   | 2.42 (1.52 - 3.87) | <0.001  |
| MLFS                                 | 4.78 (2.58 - 8.87) | <0.001  | 1.70 (0.62 - 4.67) | 0.306   |
| <b>ELN 2017 risk</b>                 |                    |         |                    |         |
| Favorable                            | Reference          |         | Reference          |         |
| Intermediate                         | 1.49 (0.81 - 2.73) | 0.196   | 2.44 (1.19 - 5.00) | 0.015   |
| Adverse                              | 2.07 (1.26 - 3.41) | 0.004   | 3.24 (1.76 - 5.97) | <0.001  |

**Abbreviations:** CI, confidence interval; CR, complete remission; CRi, complete remission with incomplete hematologic recovery; CIR, cumulative incidence of relapse; ELN, European LeukemiaNet; HR, hazard ratio; IA, idarubicin plus intermediate to high-dose cytarabine; LOW + VEN, low-intensity backbone plus venetoclax; MRD, measurable residual disease; MLFS, morphologic leukemia-free state; OS, overall survival; SCT, stem cell transplantation.

**Supplemental Table 3.** Univariate analysis for overall survival (not censored for SCT)

| Variable                   | events/N (%)   | Median (months) | log-rank | HR (95% CI)        | p-value |
|----------------------------|----------------|-----------------|----------|--------------------|---------|
| <b>Age, continuous</b>     | 329/635 (51.8) | 28.2            | -        | 1.03 (1.02 - 1.03) | <0.001  |
| <b>Age, categorical</b>    |                |                 | <0.001   |                    |         |
| Age < 60 years             | 167/338 (49.4) | 45.1            |          | 1.00               | -       |
| Age ≥ 60 years             | 162/297 (54.5) | 18.3            |          | 1.63 (1.31 - 2.03) | <0.001  |
| <b>Sex</b>                 |                |                 | 0.867    |                    |         |
| Male                       | 168/323 (52.0) | 31.1            |          | 1.00               | -       |
| Female                     | 161/312 (51.6) | 27.7            |          | 0.98 (0.79 - 1.21) | 0.836   |
| <b>Treatment intensity</b> |                |                 | <0.001   |                    |         |
| IA                         | 189/385 (49.1) | 45.2            |          | 1.00               | -       |
| LOW + VEN                  | 140/250 (56.0) | 14.0            |          | 2.03 (1.62 - 2.55) | <0.001  |
| <b>Best response</b>       |                |                 | <0.001   |                    |         |
| CR                         | 252/534 (47.2) | 39.2            |          | 1.00               | -       |
| CRi                        | 58/76 (76.3)   | 10.9            |          | 2.35 (1.76 - 3.13) | <0.001  |
| MLFS                       | 19/25 (76)     | 7.3             |          | 2.78 (1.74 - 4.43) | <0.001  |
| <b>MRD status</b>          |                |                 | <0.001   |                    |         |
| Negative                   | 187/426 (43.9) | 44.8            |          | 1.00               | -       |
| Positive                   | 142/209 (67.9) | 12.4            |          | 2.05 (1.65 - 2.56) | <0.001  |
| <b>ELN 2017 risk</b>       |                |                 | <0.001   |                    |         |
| Favorable                  | 62/161 (38.5)  | 80.9            |          | 1.00               | -       |
| Intermediate               | 82/190 (43.2)  | 56.0            |          | 1.23 (0.88 - 1.71) | 0.220   |
| Adverse                    | 178/273 (65.2) | 13.7            |          | 2.43 (1.82 - 3.25) | <0.001  |
| <b>Cytogenetics*</b>       |                |                 |          |                    |         |
| Diploid                    | 129/307 (42.0) | 44.3            | -        | 1.00               | -       |
| Other intermediate         | 42/100 (42.0)  | 63.5            | 0.710    | 0.94 (0.66 - 1.33) | 0.710   |
| 11q23                      | 20/34 (58.8)   | 17.0            | 0.030    | 1.68 (1.05 - 2.69) | 0.032   |
| t(6;9)                     | 1/8 (12.5)     | NR              | 0.056    | 0.18 (0.03 - 1.30) | 0.089   |
| inv(3)                     | 8/10 (80.0)    | 8.7             | 0.004    | 2.76 (1.34 - 5.65) | 0.006   |
| -5/5q-                     | 62/76 (81.6)   | 8.1             | <0.001   | 3.54 (2.59 - 4.83) | <0.001  |
| -7/7q-                     | 56/70 (80.0)   | 9.5             | <0.001   | 3.07 (2.23 - 4.22) | <0.001  |
| -17/17p-                   | 41/52 (78.8)   | 8.3             | <0.001   | 3.38 (2.36 - 4.85) | <0.001  |
| Complex                    | 102/136 (75.0) | 8.7             | <0.001   | 2.79 (2.14 - 3.62) | <0.001  |

\* Hazard ratios are for individual cytogenetic features compared to diploid as the baseline risk.

**Abbreviations:** CI, confidence interval; CR, complete remission; CRi, complete remission with incomplete hematologic recovery; ELN, European LeukemiaNet; HR, hazard ratio; IA, idarubicin plus intermediate to high-dose cytarabine; LOW + VEN, low-intensity backbone plus venetoclax; MRD, measurable residual disease; MLFS, morphologic leukemia-free state; NR, not reached; SCT, stem cell transplantation.

**Supplemental Table 4.** Univariate analysis for cumulative incidence of relapse (not censored for SCT)

| Variable                   | events/N (%)   | Median (months) | HR (95% CI)         | p-value |
|----------------------------|----------------|-----------------|---------------------|---------|
| <b>Age, continuous</b>     | 250/635 (39.4) | 55.9            | 1.00 (1.00 - 1.01)  | 0.410   |
| <b>Age, categorical</b>    |                |                 |                     |         |
| Age < 60 years             | 140/338 (41.4) | 64.2            | 1.00                | -       |
| Age ≥ 60 years             | 110/297 (37.0) | 35.7            | 1.01 (0.78 - 1.29)  | 0.960   |
| <b>Sex</b>                 |                |                 |                     |         |
| Male                       | 133/323 (41.2) | 46.7            | 1.00                | -       |
| Female                     | 117/312 (37.5) | 118.6           | 0.90 (0.70 - 1.15)  | 0.389   |
| <b>Treatment intensity</b> |                |                 |                     |         |
| IA                         | 153/385 (39.7) | 118.6           | 1.00                | -       |
| LOW + VEN                  | 97/250 (38.8)  | 26.2            | 1.21 (0.94 - 1.56)  | 0.142   |
| <b>Best response</b>       |                |                 |                     |         |
| CR                         | 186/534 (34.8) | 118.6           | 1.00                | -       |
| CRi                        | 49/76 (64.5)   | 7.5             | 2.55 (1.86 - 3.49)  | <0.001  |
| MLFS                       | 15/25 (60.0)   | 4.5             | 2.40 (1.29 - 4.47)  | 0.006   |
| <b>MRD status</b>          |                |                 |                     |         |
| Negative                   | 136/426 (31.9) | 118.6           | 1.00                | -       |
| Positive                   | 114/209 (54.5) | 9.96            | 2.25 (1.75 - 2.89)  | <0.001  |
| <b>ELN 2017 risk</b>       |                |                 |                     |         |
| Favorable                  | 40/161 (24.8)  | NR              | 1.00                | -       |
| Intermediate               | 71/190 (37.4)  | NR              | 1.79 (1.23 - 2.59)  | 0.002   |
| Adverse                    | 133/273 (48.7) | 17.0            | 2.77 (1.98 - 3.89)  | <0.001  |
| <b>Cytogenetics*</b>       |                |                 |                     |         |
| Diploid                    | 97/307 (31.6)  | NR              | 1.00                | -       |
| Other intermediate         | 36/100 (36.0)  | NR              | 1.12 (0.76 - 1.65)  | 0.559   |
| 11q23                      | 16/34 (47.1)   | 16.9            | 1.92 (1.07 - 3.44)  | 0.030   |
| t(6;9)                     | 3/8 (37.5)     | NR              | 1.04 (0.29 - 3.74)  | 0.956   |
| inv(3)                     | 8/10 (80.0)    | 2.9             | 5.06 (1.89 - 13.56) | 0.001   |
| -5/5q-                     | 48/76 (63.2)   | 7.0             | 3.25 (2.25 - 4.71)  | <0.001  |
| -7/7q-                     | 41/70 (58.6)   | 8.9             | 2.71 (1.84 - 3.98)  | <0.001  |
| -17/17p-                   | 38/52 (73.1)   | 6.0             | 4.24 (2.87 - 6.26)  | <0.001  |
| Complex                    | 82/136 (60.3)  | 7.5             | 2.82 (2.09 - 3.81)  | <0.001  |

\* Hazard ratios are for individual cytogenetic features compared to diploid as the baseline risk.

**Abbreviations:** CI, confidence interval; CR, complete remission; CRi, complete remission with incomplete hematologic recovery; ELN, European LeukemiaNet; HR, hazard ratio; IA, idarubicin plus intermediate to high-dose cytarabine; LOW + VEN, low-intensity backbone plus venetoclax; MRD, measurable residual disease; MLFS, morphologic leukemia-free state; NR, not reached; SCT, stem cell transplantation.

**Supplemental Table 5.** Multivariate analysis for overall survival and cumulative incidence of relapse (not censored for SCT)

| Covariate                            | OS                 |         | CIR                |         |
|--------------------------------------|--------------------|---------|--------------------|---------|
|                                      | HR (95% CI)        | p-value | HR (95% CI)        | p-value |
| <b>Model for all patients</b>        |                    |         |                    |         |
| Age, continuous                      | 1.02 (1.00 - 1.03) | 0.006   | 1.00 (0.98 - 1.01) | 0.574   |
| <b>Treatment cohort</b>              |                    |         |                    |         |
| IA                                   | Reference          |         | Reference          |         |
| LOW + VEN                            | 1.20 (0.86 - 1.66) | 0.284   | 1.01 (0.69 - 1.49) | 0.951   |
| <b>Best response</b>                 |                    |         |                    |         |
| CR                                   | Reference          |         | Reference          |         |
| CRi                                  | 1.56 (1.14 - 2.14) | 0.005   | 1.99 (1.42 - 2.80) | <0.001  |
| MLFS                                 | 1.99 (1.21 - 3.26) | 0.006   | 1.77 (0.89 - 3.52) | 0.106   |
| <b>MRD status</b>                    |                    |         |                    |         |
| Negative                             | Reference          |         | Reference          |         |
| Positive                             | 1.41 (1.10 - 1.81) | 0.007   | 1.63 (1.23 - 2.15) | 0.001   |
| <b>ELN 2017 risk</b>                 |                    |         |                    |         |
| Favorable                            | Reference          |         | Reference          |         |
| Intermediate                         | 1.24 (0.89 - 1.73) | 0.208   | 1.65 (1.13 - 2.41) | 0.009   |
| Adverse                              | 1.86 (1.37 - 2.53) | <0.001  | 2.04 (1.43 - 2.92) | <0.001  |
| <b>Model for patients ≥ 60 years</b> |                    |         |                    |         |
| Age, continuous                      | 1.03 (1.00 - 1.06) | 0.025   | 1.01 (0.98 - 1.04) | 0.575   |
| <b>Treatment cohort</b>              |                    |         |                    |         |
| IA                                   | Reference          |         | Reference          |         |
| LOW + VEN                            | 1.43 (0.87 - 2.37) | 0.162   | 1.45 (0.78 - 2.71) | 0.240   |
| <b>Best response</b>                 |                    |         |                    |         |
| CR                                   | Reference          |         | Reference          |         |
| CRi                                  | 1.26 (0.81 - 1.96) | 0.300   | 1.75 (1.10 - 2.79) | 0.019   |
| MLFS                                 | 2.27 (1.23 - 4.17) | 0.008   | 1.14 (0.46 - 2.80) | 0.782   |
| <b>MRD status</b>                    |                    |         |                    |         |
| Negative                             | Reference          |         | Reference          |         |
| Positive                             | 1.45 (1.01 - 2.08) | 0.044   | 1.77 (1.15 - 2.71) | 0.009   |
| <b>ELN 2017 risk</b>                 |                    |         |                    |         |
| Favorable                            | Reference          |         | Reference          |         |
| Intermediate                         | 1.27 (0.74 - 2.16) | 0.388   | 1.78 (0.94 - 3.37) | 0.076   |
| Adverse                              | 1.83 (1.17 - 2.86) | 0.008   | 2.02 (1.18 - 3.45) | 0.010   |

**Abbreviations:** CI, confidence interval; CR, complete remission; CRi, complete remission with incomplete hematologic recovery; CIR, cumulative incidence of relapse; ELN, European LeukemiaNet; HR, hazard ratio; IA, idarubicin plus intermediate to high-dose cytarabine; LOW + VEN, low-intensity backbone plus venetoclax; MRD, measurable residual disease; MLFS, morphologic leukemia-free state; OS, overall survival; SCT, stem cell transplantation.

**Supplemental Figure 1.** Cumulative incidence of treatment-related mortality

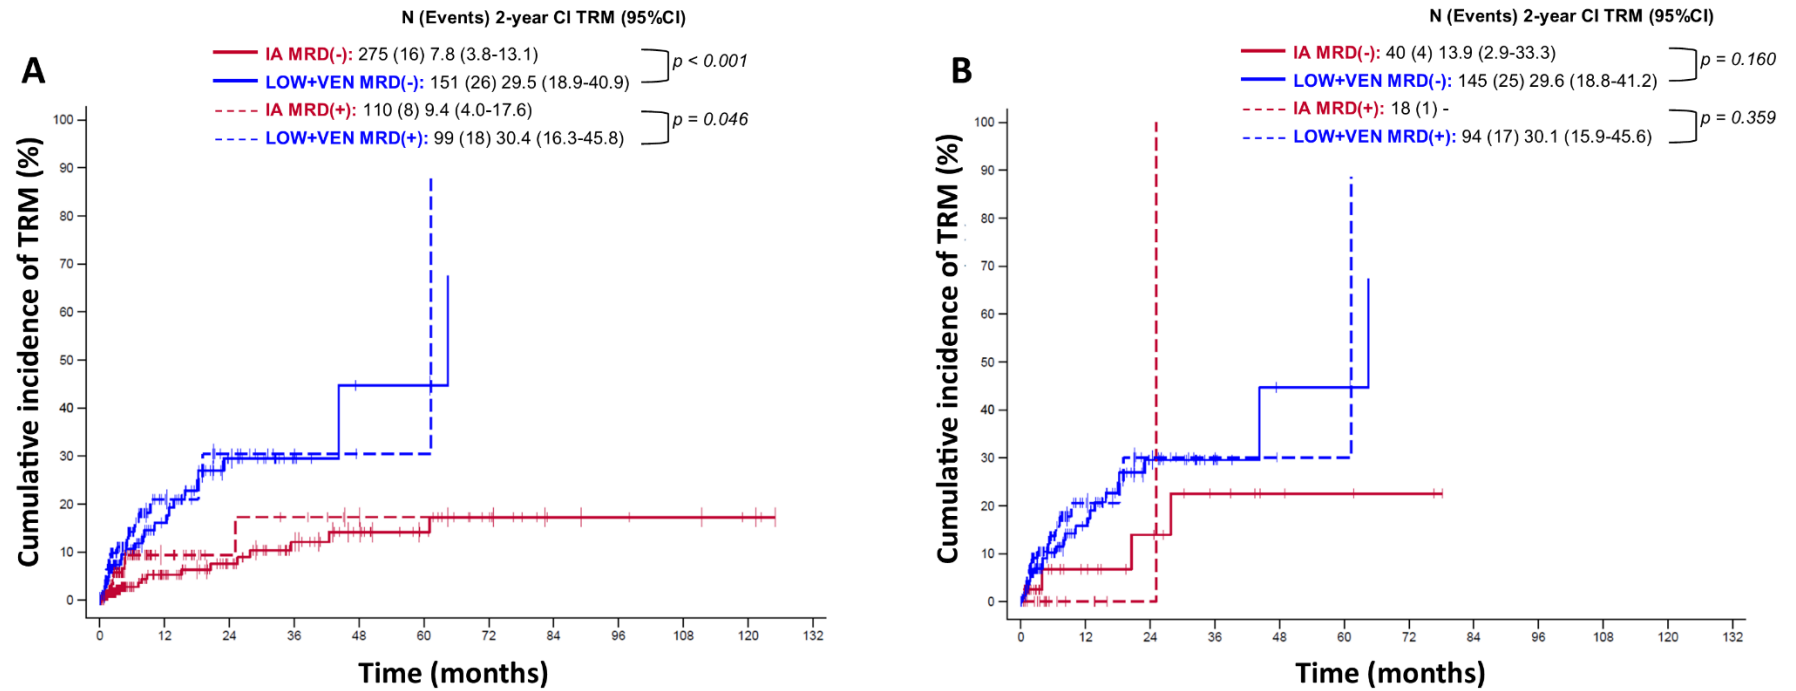

(A) CI of TRM stratified by treatment intensity and MRD status, full cohort. (B) CI of TRM stratified by treatment intensity and MRD status, age  $\geq 60$  years only. Data shown is censored at the time of SCT.

**Abbreviations:** CI, confidence interval; CI TRM, cumulative of treatment-related mortality; IA, idarubicin plus intermediate to high-dose cytarabine; LOW + VEN, low-intensity backbone plus venetoclax; MRD, measurable residual disease, SCT, stem cell transplantation.

**Supplemental Figure 2.** Overall survival and cumulative incidence of relapse stratified by treatment intensity and MRD status (not censored for SCT)

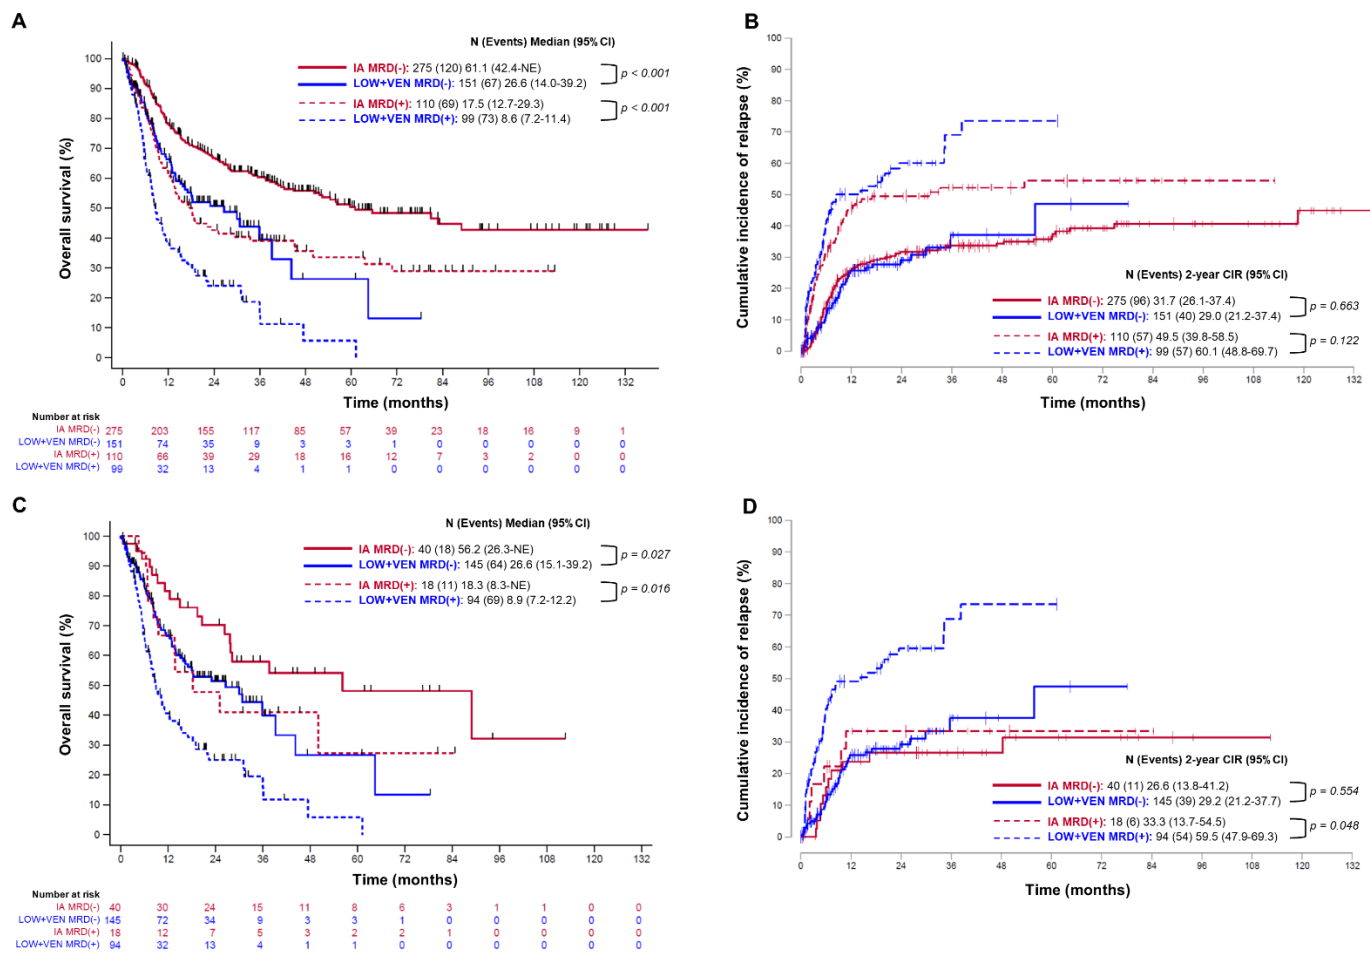

**(A)** OS stratified by treatment intensity and MRD status, full cohort. **(B)** CIR stratified by treatment intensity and MRD status, full cohort. **(C)** OS stratified by treatment intensity and MRD status, age  $\geq 60$  years only. **(D)** CIR stratified by treatment intensity and MRD status, age  $\geq 60$  years only.

**Abbreviations:** CI, confidence interval; CIR, cumulative incidence of relapse; IA, idarubicin plus intermediate to high-dose cytarabine; LOW + VEN, low-intensity backbone plus venetoclax; MRD, measurable residual disease; NE, not estimable; SCT, stem cell transplantation.



**Supplemental Figure 3.** Overall survival and cumulative incidence of relapse stratified by treatment intensity for patients achieving MRD-negativity within ELN categories (not censored for SCT)

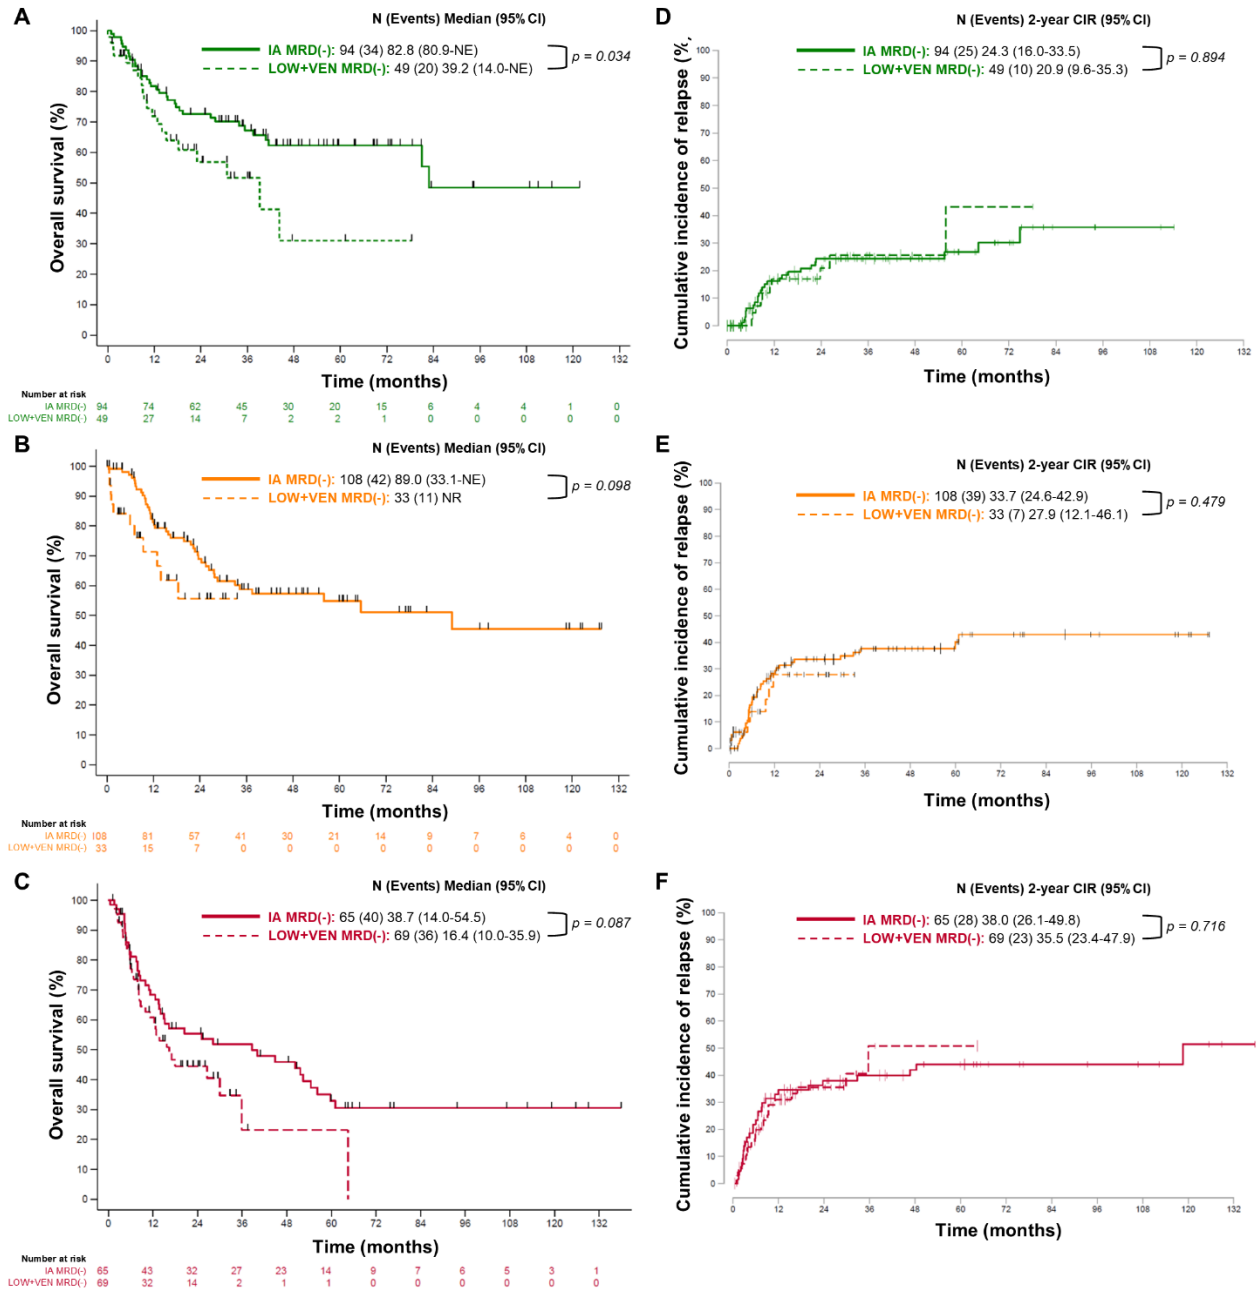

(A) ELN favorable, MRD negative. OS stratified by treatment. (B) ELN intermediate, MRD negative. OS stratified by treatment. (C) ELN adverse, MRD negative. OS stratified by treatment. (D) ELN favorable, MRD negative. CIR stratified by treatment. (E) ELN intermediate, MRD negative. CIR stratified by treatment. (F) ELN adverse, MRD negative. CIR stratified by treatment.

**Abbreviations:** CI, confidence interval; CIR, cumulative incidence of relapse; IA, idarubicin plus intermediate to high-dose cytarabine; LOW + VEN, low-intensity backbone plus venetoclax; MRD, measurable residual disease; NE, not estimable; NR, not reached; OS, overall survival; SCT, stem cell transplantation.
